# Supplementary material
Source: Research Square preprint supplement (doi:10.21203/rs.3.rs-9430045/v1)
Supplement: Supplementary file 1 [file c09ac9e5ce4e94d20c24de08.pdf]

# Supplement Material

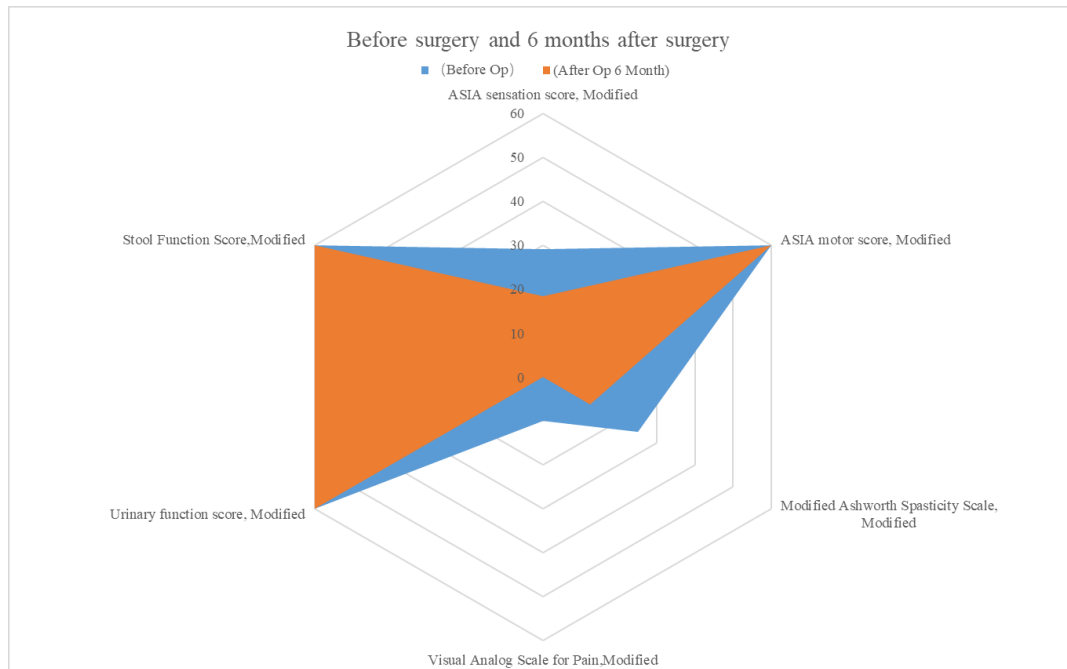

**eFig.1. Radar chart of the clinical characteristics of the treatment group before surgery and 6 months after surgery** (Note: Modified-For each score, the percentage was calculated by dividing the individual score by the maximum possible score for that scale and then multiplying by 100%. A higher percentage indicates more pronounced functional impairment.)

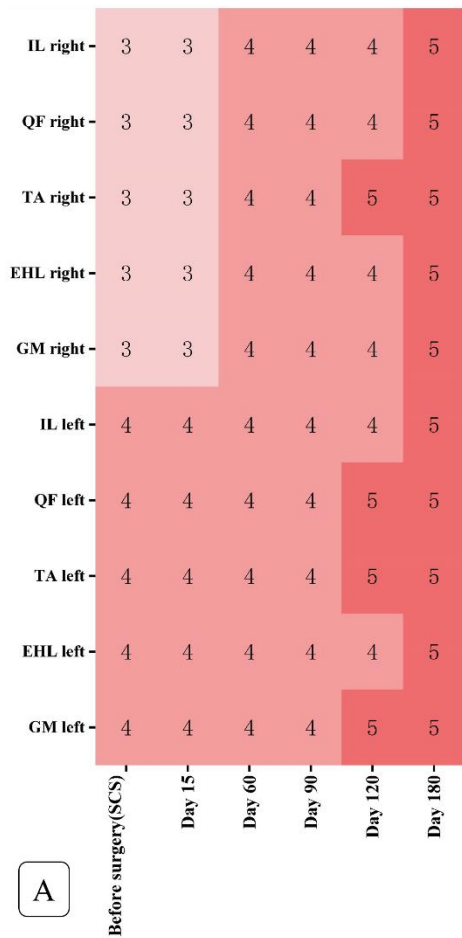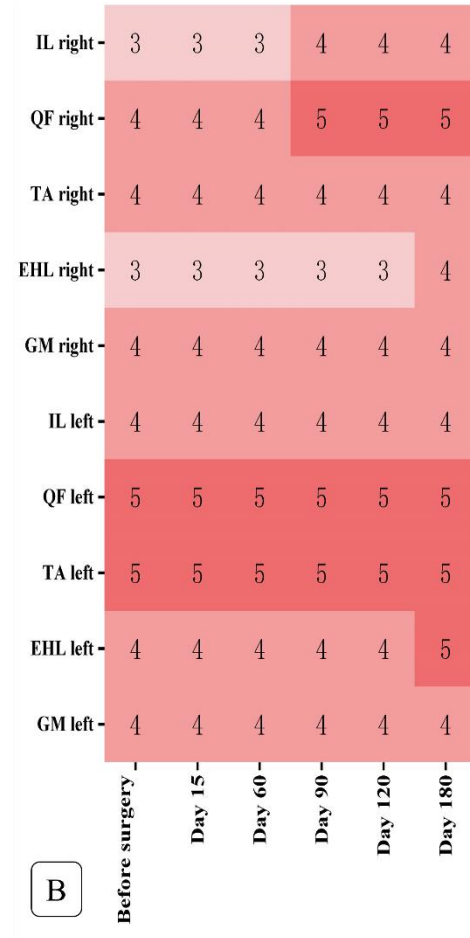

**eFig.2 comprehensive comparison of functional recovery heatmap between spinal cord injury patients who received eSCS following decompression surgery**

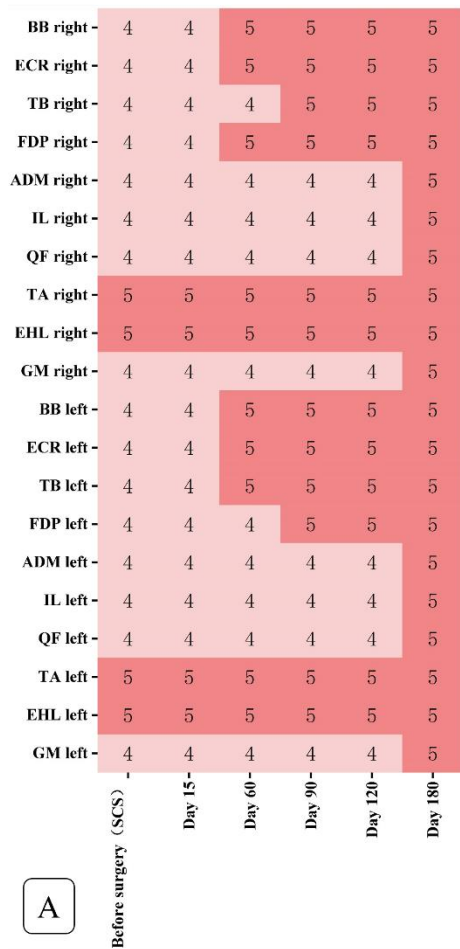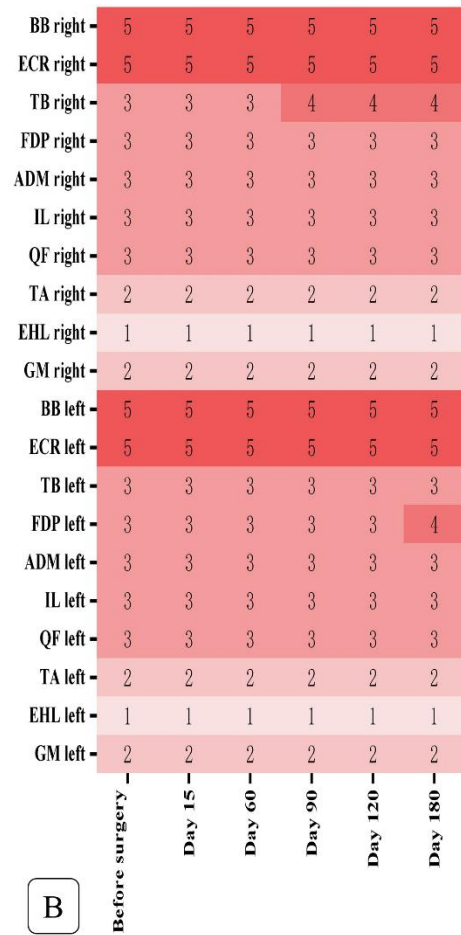

**eFig.3 Comprehensive comparison of functional recovery heatmap between spinal cord injury patients who received eSCS following decompression surgery**

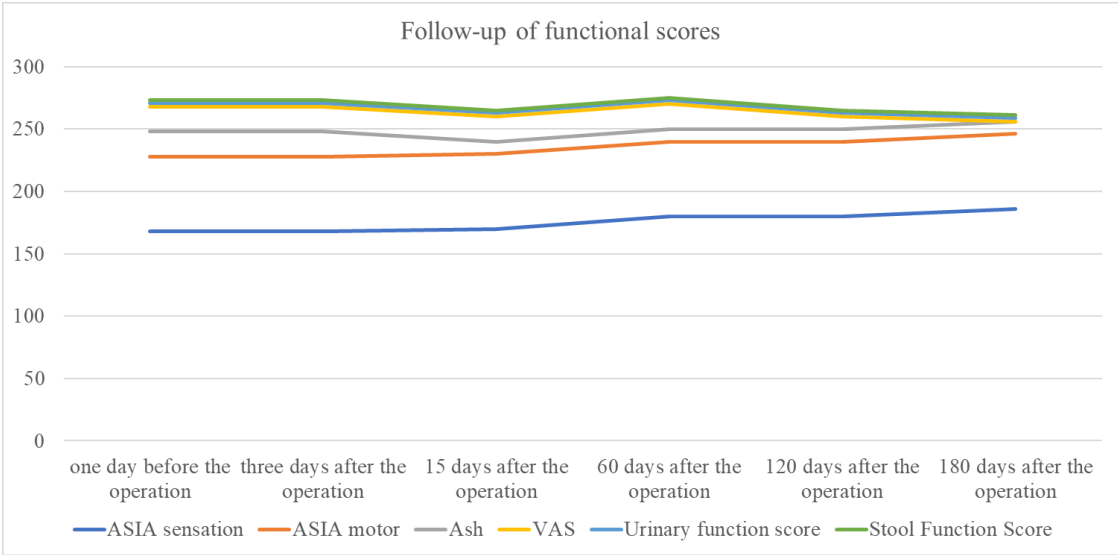

**eFig.4. The longitudinal dynamic changes of functional score during follow-up**

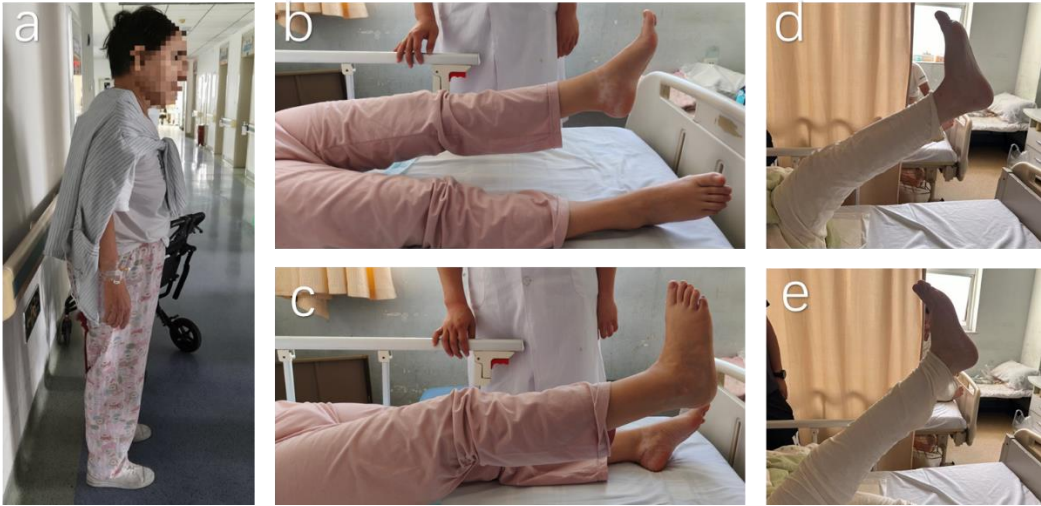

**eFig.5. Functional recovery following eSCS implantation.**

**eTable.1. Comparison of the short-term functional recovery between the SCS + PT and PT-only groups**

| Functional recovery | SCS + PT (n = 15) |           |                  | PT (n = 15) |           |                  |
|---------------------|-------------------|-----------|------------------|-------------|-----------|------------------|
|                     | Positive          | Unchanged | Positive rate(%) | Positive    | Unchanged | Positive rate(%) |
| Sensation           | 14                | 1         | 93.3             | 9           | 6         | 60.0             |
| Strength            | 7                 | 8         | 46.7             | 2           | 13        | 13.3             |
| Muscle spasticity   | 11                | 4         | 73.3             | 4           | 11        | 26.7             |
| VAS Pain            | 9                 | 6         | 60.0             | 3           | 12        | 20.0             |
| Urine function      | 3                 | 12        | 20.0             | 2           | 13        | 13.3             |
| Stool function      | 2                 | 13        | 13.3             | 2           | 13        | 13.3             |

Note: The positive rate (%) presented in reflects the percentage of participants who achieved clinically meaningful improvement in each functional domain.

**eTable.2. Comparison of scores between the postoperative SCS+PT group and the PT group**

| Variables                                        | Groups             |             | <i>P</i> value |
|--------------------------------------------------|--------------------|-------------|----------------|
|                                                  | eSCS + PT (n = 15) | PT (n = 15) |                |
| ASIA sensation score, mean (SD)                  | 159(37.0)          | 145(51.6)   | 0.396          |
| ASIA motor score, median (IQR)                   | 60(0-80)           | 30(0-75)    | 0.343          |
| Modified Ashworth Spasticity Scale, median (IQR) | 20(10-32)          | 0(0-10)     | 0.009          |
| Visual Analog Scale for Pain, median (IQR)       | 20(0-30)           | 20(0-30)    | 0.603          |
| Urinary function score, median (IQR)             | 3(1-4)             | 2(1-3)      | 0.527          |
| Stool Function Score, median (IQR)               | 3(2-4)             | 2(1-3)      | 0.263          |
